# Supplementary material for: Expression and Characterization of a Novel Cold-Adapted Chitosanase from Marine Renibacterium sp. Suitable for Chitooligosaccharides Preparation
Source: MDPI journal article supplement (doi:10.3390/md19110596), 2021-10-21
Supplement: s1 [file s1]

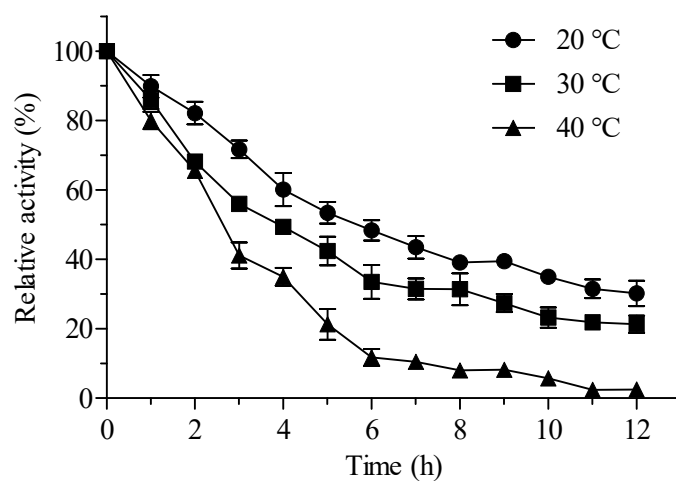

**Figure S1.** Thermal stability of CsnY within 12 h. The residual activities of CsnY were measured at various time intervals during incubation at certain temperatures (20 °C, 30 °C, and 40 °C).

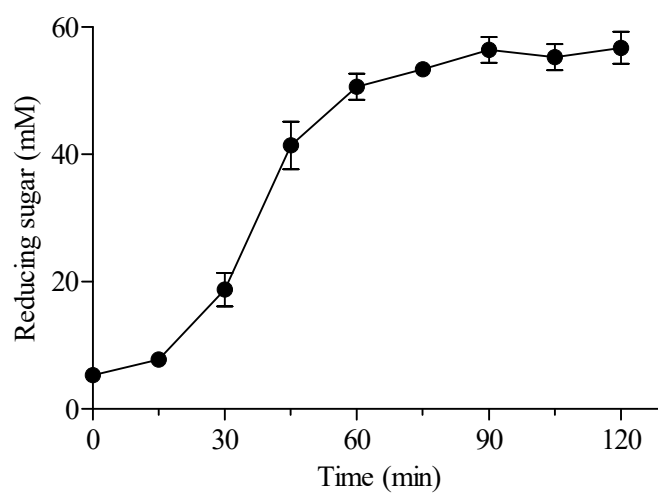

**Figure S2.** Catalytic hydrolysis of chitosan by CsnY. The amounts of reducing sugar generated during hydrolysis were monitored using 3,5-dinitrosalicylic acid (DNS) method.
